1 **Taxonomic identification from metagenomic and metabarcoding data using**  
2 **any genetic marker**

3 Johan Bengtsson-Palme<sup>1,2,3,\*</sup>, Rodney T. Richardson<sup>4</sup>, Marco Meola<sup>5</sup>, Christian Wurzbacher<sup>6,7</sup>,  
4 Émilie D. Tremblay<sup>8</sup>, Kaisa Thorell<sup>9</sup>, Kärt Kanger<sup>10</sup>, K. Martin Eriksson<sup>11</sup>, Guillaume J.  
5 Bilodeau<sup>8</sup>, Reed M. Johnson<sup>4</sup>, Martin Hartmann<sup>12,13</sup>, R. Henrik Nilsson<sup>6,14</sup>

6  
7 **Affiliations**

8 <sup>1</sup> Department of Infectious Diseases, Institute of Biomedicine, The Sahlgrenska Academy,  
9 University of Gothenburg, Guldhedsgatan 10, SE-413 46, Gothenburg, Sweden

10 <sup>2</sup> Center for Antibiotic Resistance research (CARE) at University of Gothenburg, Box 440, SE-  
11 40530, Gothenburg, Sweden

12 <sup>3</sup> Wisconsin Institute for Discovery, University of Wisconsin-Madison, 330 N. Orchard Street,  
13 Madison, WI 53715, USA

14 <sup>4</sup> Department of Entomology, The Ohio State University–Ohio Agricultural Research and  
15 Development Center, 1680 Madison Ave., Wooster, OH 44691, USA

16 <sup>5</sup> Fermentation Organisms, Methods Development and Analytics, Agroscope, CH-3003 Bern,  
17 Switzerland

18 <sup>6</sup> Department of Biological and Environmental Sciences, University of Gothenburg, Box 461, SE-  
19 405 30 Gothenburg, Sweden

20 <sup>7</sup> Chair of Urban Water Systems Engineering, Technical University of Munich, Am Coulombwall  
21 8, 85748 Garching, Germany

22 <sup>8</sup> Canadian Food Inspection Agency, Ottawa, ON K2H 8P9, Canada

23 <sup>9</sup> Department of Microbiology, Tumor and Cell Biology, Karolinska Institutet, Nobels Väg 16,

24 SE-171 77 Stockholm, Sweden

25 <sup>10</sup> Institute of Ecology and Earth Science, University of Tartu, Vanemuise 46, 51014 Tartu,

26 Estonia

27 <sup>11</sup> Department of Mechanics and Maritime Sciences, Chalmers University of Technology, SE-412

28 96 Gothenburg, Sweden

29 <sup>12</sup> Forest Soils and Biogeochemistry, Swiss Federal Research Institute WSL, CH-8903

30 Birmensdorf, Switzerland

31 <sup>13</sup> Sustainable Agroecosystems, Institute of Agricultural Sciences, Department of Environmental

32 Systems Science, ETH Zurich, CH-8092 Zurich, Switzerland

33 <sup>14</sup> Gothenburg Global Biodiversity Centre, Box 461, SE-405 30 Göteborg, Sweden

34 \* Corresponding author: [johan.bengtsson-palme@microbiology.se](mailto:johan.bengtsson-palme@microbiology.se); +46 31 342 46 26

35

36

37 **Correct taxonomic identification of DNA sequences is central to studies of biodiversity**  
38 **using both shotgun metagenomic and metabarcoding approaches. However, there is no**  
39 **genetic marker that gives sufficient performance across all the biological kingdoms,**  
40 **hampering studies of taxonomic diversity in many groups of organisms. We here present**  
41 **a major update to Metaxa2 (<http://microbiology.se/software/metaxa2/>) that enables**  
42 **the use of any genetic marker for taxonomic classification of metagenome and amplicon**  
43 **sequence data.**

44 Sequencing of DNA has revolutionized taxonomy, providing unprecedented resolution for  
45 species identification and definition<sup>1,2</sup>. Similarly, the advent of large-scale sequencing techniques  
46 has opened entirely new windows on ecology, both for microbes and multicellular species<sup>3</sup>. In  
47 particular, high-throughput assignment of species and genus designations based on mixed  
48 samples of organisms or environmental substrates, so called DNA metabarcoding<sup>4</sup>, has made it  
49 possible to perform fine-tuned investigations of taxonomic diversity and to understand ecological  
50 interactions in different types of environments. However, an important bottleneck in such  
51 analyses is the size and quality of the reference sequence data to which the newly generated  
52 sequence reads are compared<sup>5,6</sup>. Furthermore, while the ribosomal small-subunit (16S/18S/SSU)  
53 is a popular marker choice, no single genetic marker seems to be sufficient for covering all  
54 taxonomic groups with satisfactory accuracy for species or even genus assignments<sup>7-9</sup>. This has  
55 led to the establishment of a wide range of other genetic markers for DNA barcoding and  
56 metabarcoding in different organisms, such as *rbcL*, *matK*, *trnL*, and *trnH* for plants<sup>10</sup>, the ITS  
57 region for fungi<sup>11</sup>, and the COI gene for animals<sup>12</sup>. This broad diversity of DNA barcodes  
58 challenges sequence classification tools, which usually have been developed with the rRNA genes

59 in mind<sup>13-15</sup>. Although some of these software tools can be re-trained on other reference datasets,  
60 or have their reference databases exchanged for datasets representing other genes, they still make  
61 assumptions with regards to the reference data – such as global alignability – that often negatively  
62 affect performance, or prevent software operation altogether. In addition, increasing stringency  
63 with regards to correct taxonomic assignment often comes at the cost of lower proportions of  
64 classified sequences<sup>16</sup>. This tendency has been shown for some taxonomic classifiers also when  
65 operating on the rRNA genes<sup>17</sup>. The classification tool that appear least prone to show such a  
66 relationship is Metaxa2, which is based on a combination of hidden Markov models (HMMs) and  
67 sequence alignments<sup>17</sup>. Metaxa2 examines arbitrary DNA sequence datasets, such as genomes,  
68 metagenomes, or amplicons, and extracts the SSU and/or LSU rRNA genes; classifies the  
69 sequences to taxonomic origin; and optionally computes a range of diversity estimates for the  
70 studied community. However, Metaxa2 has so far been strictly limited to operation on the rRNA  
71 genes, preventing its use for other DNA barcodes. Yet, the capability of Metaxa2 to achieve high  
72 precision for its classifications while maintaining relatively high sensitivity would be highly  
73 desirable also for other genetic markers, particularly as these genes often are under-sampled in  
74 terms of species coverage<sup>16</sup>. Against this backdrop, the aim of this study was to adapt the  
75 Metaxa2 software for any additional DNA barcode. To this end, the paper presents an update to  
76 Metaxa2 itself, allowing the use of custom databases. We also introduce the Metaxa2 Database  
77 Builder – a software tool that allows users to create customized databases from DNA sequences  
78 and their associated taxonomic affiliations – and a repository for additional reference sets to meet  
79 the needs of the user.

80 The Metaxa2 Database builder has three different operating modes. The divergent mode is  
81 adapted to deal with barcoding regions for which fairly large sequence variability occurs among  
82 the target taxa, such as the eukaryotic ITS region<sup>18</sup>, the *trnH* gene used in plant barcoding<sup>16</sup> and  
83 the COI gene used, e.g., for insects<sup>12</sup>. The conserved mode, on the other hand, is suitable for  
84 barcoding regions that are highly conserved among the target taxa, such as the SSU rRNA genes<sup>19</sup>  
85 and the bacterial *rpoB* gene<sup>20</sup>. In addition, this mode is advisable for certain barcoding genes used  
86 in narrower taxonomic groups, such as Oomycota. In the conserved mode, the software extracts  
87 the barcoding regions from every input sequence and aligns them in order to determine the level  
88 of conservation across every position in the alignment. The most conserved regions are then  
89 extracted from the alignment and used to build HMMs that can be used to extract the barcoding  
90 region from metagenomic data. In the divergent mode, the database builder instead clusters the  
91 input sequences, aligns every individual cluster and builds one HMM for each cluster. The third  
92 mode – the hybrid mode – combines the features and advantages of the two others, but also their  
93 drawbacks. It should therefore only be used when none of those produces satisfactory results.

94 A key component for the high accuracy of Metaxa2 is the hand-curated classification database<sup>17</sup>.  
95 In the database builder, we have tried to emulate this curation by automating as much of our  
96 procedure as possible. There are three ways in which the software attempts to improve the  
97 taxonomic information. First, it can remove uninformative sequences from unknown specimens  
98 or mixed environmental samples. Second, it can make an effort to standardize the input  
99 taxonomy into seven levels. Finally, it can filter out entries without taxonomic affiliation at, for  
100 example, the genus or species level.

101 We evaluated the Metaxa2 Database Builder on 11 different barcoding regions, targeting a variety  
 102 of uses (Supplementary Table 1). We first assessed the software performance on full-length  
 103 sequences using the self-evaluation function, measured in terms of sensitivity, specificity, and  
 104 error per assignment rate (Supplementary Fig. 1, see methods for details). In general, we found  
 105 that at least one of the methods produced more than 80% correct assignments at the family level  
 106 for half of the markers (Fig. 1a). However, three of the genetic markers – *rpb1*, *rpb2* and *cpn60* –  
 107 consistently showed lower performance across all groups, even at the order level. When we  
 108 multiplied the proportion of correct assignments with the total proportion of sequences assigned,  
 109 it was clear that the divergent mode consistently was the best performing setting by this measure  
 110 (Fig. 1b), mostly because the divergent mode always included the largest proportion of the input  
 111 sequences in the final database (Supplementary Fig. 2). However, since the divergent mode  
 112 includes essentially all input sequences in the classification database, it necessitates more careful  
 113 manual curation of the dataset used for database creation. Therefore, if the data at hand is of  
 114 uncertain quality, it may still be more adequate to use the conserved mode.

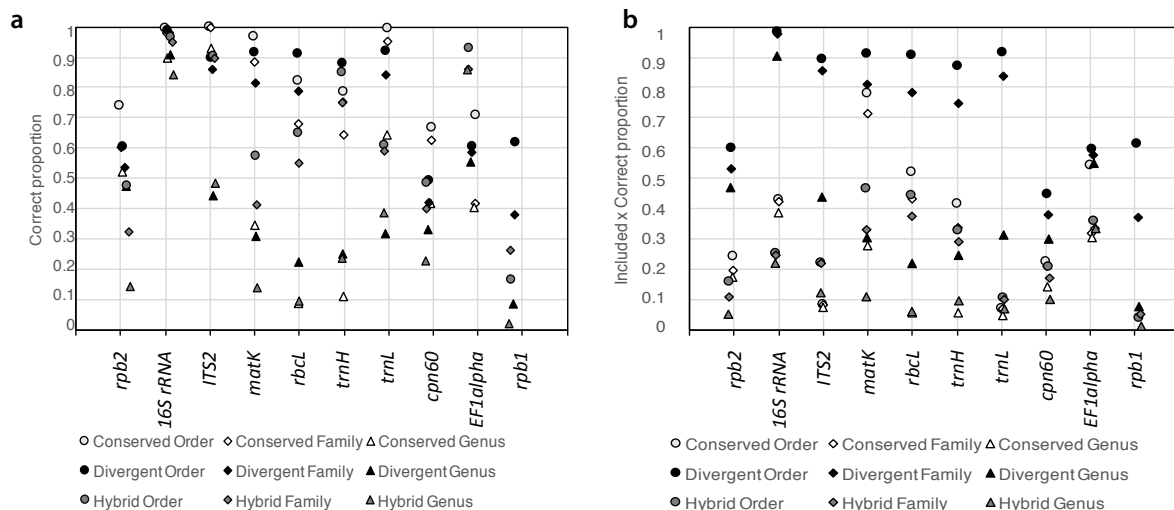

115

116 **Fig. 1.** Self-evaluated performance of the Metaxa2 Database Builder in different operating modes (conserved,  
117 divergent and hybrid) on ten different DNA barcoding regions. A) Proportion of assigned sequences classified to the  
118 correct order (circles), family (diamonds) and genera (triangles). B) Proportion of correctly assigned sequences  
119 multiplied with the proportion of sequences included in the final classification databases (see Supplementary Fig. 2).  
120 The ATP9-NAD9 genetic marker is not shown, because it only had relevant taxonomic differences at the species  
121 level.

122

123 As an additional performance assessment, we followed the procedure from the original Metaxa2  
124 evaluation<sup>17</sup> and generated fragments of 150 nucleotides from each barcoding region to estimate  
125 the performance on shotgun metagenomic data. Here, we found that for most regions, the  
126 divergent mode generated the highest proportion of correct classifications (Fig. 2a). For  
127 EF1alpha, the hybrid mode performed better, for *matK* the operating modes were essentially tied,  
128 and for ATP9-NAD9 the conserved and hybrid modes performed the best. However, the  
129 divergent mode also produced higher numbers of misclassifications than the conserved mode did  
130 for ITS2, *matK* and *rbcL*, although the hybrid mode showed the largest numbers of incorrect  
131 assignments overall (Fig. 2b). Generally, the divergent mode showed the lowest levels of  
132 unclassified input sequences and over-predictions (Fig. 2c, 2d). Still, there are obvious differences  
133 in performance between different genetic markers. Particularly, it seems to be difficult to build  
134 appropriate models for the *rpb* genes and *cpn60*, at least based on the sequence data we used.  
135 Depending on what the user values the highest (comprehensiveness, stringency, precision etc.),  
136 different settings would be desirable, and several combinations of modes and filtering options  
137 should be evaluated against each other to find the optimal settings for each genetic marker and  
138 reference dataset. We furthermore compared the evaluation of the fragments to the internal  
139 software evaluation for each dataset (Supplementary Fig. 3). We found an essentially linear  
140 relationship between the proportion of sequences included in the database times the proportion

141 of correct sequences in the internal evaluation and the proportion of correctly assigned sequence  
 142 fragments (Supplementary Fig. 3e), and thus this may provide a robust measure of overall  
 143 database performance.

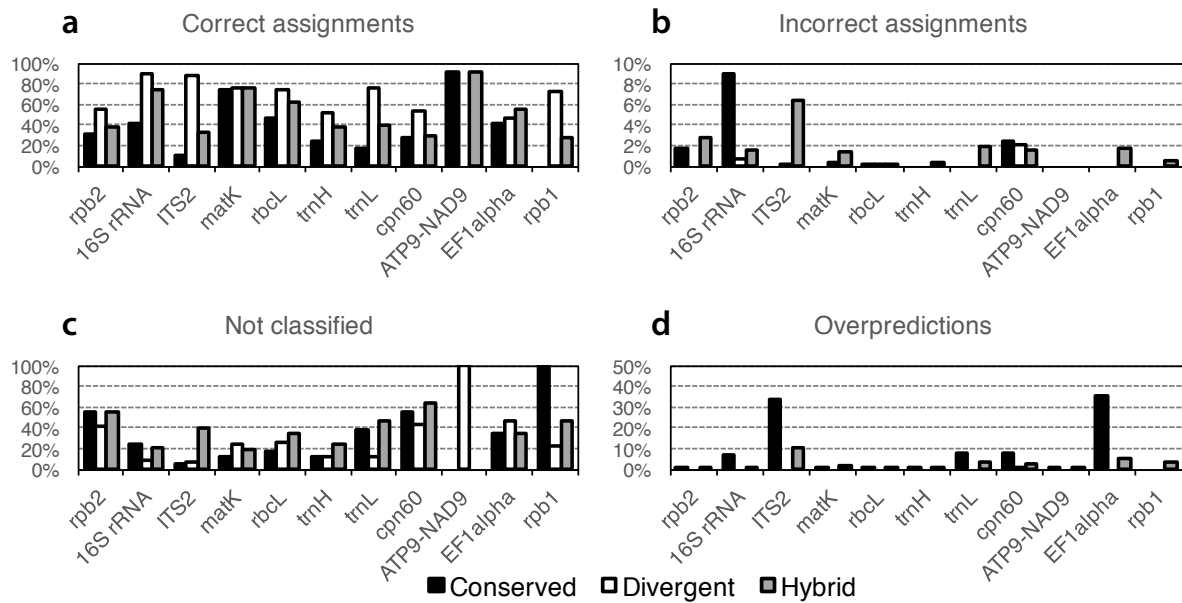

144

145 **Fig. 2.** Family level Metaxa2 performance on randomly generated 150 bp fragments originating from the sequence datasets used  
 146 to build the respective databases in the three different modes (Conserved, Divergent and Hybrid). A) Proportions of fragments  
 147 assigned to the correct taxonomic family. B) Proportions of fragments assigned to an incorrect family. C) Proportions of  
 148 fragments not assigned, or not recognized as belonging to the investigated barcoding region, at the family level. D) Family-level  
 149 overpredictions, i.e. the proportions of sequence fragments belonging to a family not present in the final database, which were  
 150 still assigned to a (different) family by Metaxa2. Note that the ATP9-NAD9 dataset is only used for species identification and thus  
 151 this marker would be expected to show perfect performance on the family level. Note also that the Y-axis scales are different for  
 152 B and for D compared to A and C.

153 We also compared the classification performance of the native Metaxa2 database to those  
 154 resulting from automated construction based on SILVA. We built databases from release 111  
 155 (which was used as a starting point for the native Metaxa2 database) and release 128 in the  
 156 conserved mode, with two versions for each release; one in which no filtering was applied and  
 157 one in which we applied the filtering designed to mimic the manual curation process. We then  
 158 classified simulated SSU fragments using Metaxa2, replacing the native database with the newly



159 built ones. Overall, the results were surprisingly similar (Supplementary Fig. 4), contrary to what  
160 was previously shown when the native database was replaced with the GreenGenes database<sup>17</sup>.  
161 Interestingly, there were also rather small differences between the non-filtered and the  
162 automatically filtered databases, although applying filtering increased the number of classified  
163 sequence fragments with full taxonomic annotation and lowered the proportion of incorrect  
164 assignments, particularly at short fragment lengths. This indicates that the automated approach to  
165 database building is feasible, at least when the underlying sequence and taxonomy data are of  
166 high quality.

167 Evaluations of which taxonomic classification tools show the most consistent performance in  
168 terms of sensitivity and specificity are still largely incomplete<sup>21</sup>, particularly for non-standard  
169 barcoding regions, but commonly used software for taxonomic assignment, such as the RDP  
170 Naïve Bayesian Classifier<sup>13</sup> and Rtax<sup>14</sup>, have all been shown to perform subpar or inconsistently in  
171 different settings<sup>15-17</sup>. We believe that the lack of comprehensive evaluation does not excuse the  
172 use of methods that produce incorrect or irrelevant results. With decreasing cost of DNA  
173 sequencing and increasing use of shotgun metagenomics for studies of biological communities,  
174 these updates to the Metaxa2 software – vastly extending its capabilities to virtually any high-  
175 quality DNA barcode in use – will enable a leap forward for molecular ecologists and others in  
176 need of precise taxonomic assignment among groups of taxa that are not feasibly targeted by  
177 traditional barcoding markers.

178

## 179 **Methods**

180 **Software implementation.** The Metaxa2 Database Builder (metaxa2\_dbb) is a command-line,  
181 open source, Unix/Linux tool implemented in Perl. The software requires, on top of Perl, the  
182 Metaxa2<sup>17</sup>, HMMER3<sup>22</sup>, NCBI BLAST<sup>23</sup>, and MAFFT<sup>24</sup> software to be installed. In addition,  
183 USEARCH<sup>25</sup> or VSEARCH<sup>26</sup> is highly recommended for full functionality. In short, the  
184 metaxa2\_dbb tool creates the hidden Markov models (HMMs) and BLAST reference databases  
185 required to build a custom Metaxa2 classification database. Importantly, metaxa2\_dbb can be run  
186 in three different operating modes, depending on how similar the sequences in the reference  
187 database are to each other.

188 In the conserved mode, used when sequences have regions of relatively high sequence similarity,  
189 the software first identifies a suitable main reference sequence, either by user selection or by  
190 clustering the sequences at 80% identity using USEARCH, and then selecting the representative  
191 sequence of the largest cluster. Next, it uses the (5') start and (3') end of the main reference  
192 sequence to define which of the other sequences in the input dataset should be considered full-  
193 length, and extracts those regions using Metaxa2. Thereafter, the identified full-length sequences  
194 are aligned using MAFFT, and the regions outside of the start and end of the main reference  
195 sequence are trimmed away before re-aligning the trimmed sequences again. This alignment is  
196 then used to determine the degree of sequence conservation across the alignment, to identify the  
197 regions of high and low conservation. The conserved regions of the alignment are extracted and  
198 aligned individually using MAFFT. Those alignments are used to build separate HMMs for each  
199 conserved region with hmmbuild of the HMMER package. The full-length input sequences  
200 matching at least half of those HMMs are then used to build the BLAST database used for

201 classification, and their sequence IDs are edited to be compatible with the Metaxa2 database  
202 structure.

203 In the divergent mode, the input sequences are first clustered into groups with at least 20%  
204 sequence identity using USEARCH. Each such cluster is then aligned separately using MAFFT.  
205 The alignments are subsequently split at the mid position (including gaps), and each pair of  
206 alignments is used to build two separate HMMs using hmmbuild. The input sequences matching  
207 at least one of those HMMs are then used to build the BLAST database for classification, and  
208 their sequence IDs are edited as above. The hybrid mode is a combination of the conserved and  
209 divergent modes, in which the database builder will cluster the input sequences at 20% identity  
210 using USEARCH, and then proceed with same approach as in the conserved mode on each  
211 resulting cluster separately.

212 From this point, the analysis proceeds identically for the three modes. The software reads  
213 taxonomy data in any of the following formats: ASN.1, NCBI XML, and INSD XML formats, as  
214 provided by GenBank<sup>27</sup>; FASTA format with taxonomy data as part of the sequence headers, as  
215 provided by the SILVA<sup>28</sup> and Greengenes<sup>29</sup> databases; and the Metaxa2 tabulated taxonomy  
216 format. Optionally, the taxonomy data can be filtered to exclude sequences from uncultured or  
217 unknown organisms or with low-resolution taxonomic annotation information. The sequence  
218 data and taxonomic information are subsequently crosschecked such that entries are only  
219 retained if both sequence and taxonomy data are present. The remaining sequences are then  
220 compiled into a BLAST database using formatdb or makeblastdb of the BLAST/BLAST+  
221 packages. Thereafter, unless pre-determined sequence identity cutoffs are provided by the user,  
222 suitable identity thresholds for taxonomic assignments at different classification levels are

223 automatically determined. This is done by aligning the sequences in the BLAST database using  
224 MAFFT and then calculating the pairwise percent identity within and between taxonomic groups  
225 (intra- and inter-specific sequence identity). The identity cutoff for each taxonomic level is then  
226 set to be below the lowest intra-specific pairwise identity and, if possible, above the highest inter-  
227 specific pairwise identity. The cutoff can never be set to be above 99% identity for any  
228 taxonomic level.

229 Finally, the metaxa2\_dbb software can perform an optional database evaluation step, which is  
230 further described below. A more thorough description of the database construction process can  
231 be found in the software manual (Supplementary Item 1). It should also be noted that to make  
232 the Metaxa2 classifier more reliable across a variety of barcoding regions, we have modified the  
233 algorithm for assigning reliability scores (see the manual for details; Supplementary Item 1).  
234 These modifications in general have very little effect on SSU and LSU classifications, but can  
235 nevertheless result in slight differences when the same dataset is classified using this version of  
236 Metaxa2 and versions prior to 2.2.

237 **Automatic correction of taxonomic data.** If the user chooses, metaxa2\_dbb can attempt to  
238 adjust the supplied taxonomy data in order to better match the taxonomic levels to those  
239 proposed by the Metaxa2 software (domain, phylum/kingdom, class, order, family, genus,  
240 species, and strain/subspecies). The phylum level is sorted out first, by checking which input  
241 taxonomic level that corresponds to a list of recognized phyla/kingdoms. This is followed by  
242 searching for a taxonomic level below the phylum level with an annotation ending with “-ales” to  
243 define the order level (unless the entry seems to be of metazoan origin). Then, the class level is  
244 defined as the level above the order level, and the family level is defined as the first level below

245 the order level and with an annotation ending with “-ceae” (or “-idae” for metazoans). The  
246 species level is then identified by finding a taxonomic annotation similar to a Latin binomial  
247 using regular expressions. The genus level is finally defined as the level containing the genus part  
248 of the Latin binomial. This procedure can correct the vast majority of inconsistent taxonomic  
249 annotation data, although manual curation of the output data is highly recommended to catch  
250 exceptional cases.

251 **Use cases and software evaluation.** We evaluated the metaxa2\_dbb software by providing 12  
252 different use cases involving 11 different DNA barcodes used in different scenarios  
253 (Supplementary Table 1). Notably, the datasets used to evaluate the software were not collected  
254 for the specific purpose of this evaluation, but were rather typical representatives of reference  
255 datasets used in previous or ongoing studies, thereby representing realistically relevant use cases  
256 for the Metaxa2 Database Builder very well. For the ITS2, *matK*, *rbcL*, *trnL* and *trnH* genetic  
257 markers, references were obtained from Richardson et al. (2017)<sup>16</sup>. Briefly, all NCBI nucleotide  
258 sequences for vascular plant available on 2016-03-04 were downloaded, filtered by length, and all  
259 sequences with more than two sequential uncalled nucleotides were removed. The datasets were  
260 then filtered to remove duplicates and sequences from plants not present in Ohio and  
261 surrounding states and provinces. Taxonomic information was obtained from NCBI taxonomy<sup>30</sup>.  
262 Sequences with undefined taxonomic information at any rank were removed. For *rpb1*, *rpb2* and  
263 *EFalpha*, references were obtained from the fungal six-gene phylogeny of James et al.<sup>31</sup>. Sequence  
264 data and taxonomic information were obtained from NCBI. For the 16S rRNA gene, sequences  
265 and taxonomic data for type-strains and cultured strains were downloaded from SILVA release  
266 128<sup>32</sup>, and SATIVA<sup>33</sup> was used to remove mislabeled strains. For *cpn60*, sequences were

267 downloaded from the cpnDB<sup>34</sup> as of 2016-10-21. The complete nucleotide sequences of group I  
268 chaperonins, i.e. *cpn60* (also known as *hsp60* or *groEL*), which is found in bacteria, some archaea,  
269 mitochondria and plastids, were used for building the database. Two datasets were downloaded,  
270 both the FASTA file of all group I sequences and a reduced file with only reference genome  
271 representatives. Taxonomic classifications were transferred from the SILVA annotation of  
272 release 111 and then manually curated. Finally, for ATP9-NAD9, we used a database assembled  
273 from curated sequences including 140 different *Phytophthora* species/hybrids (GenBank accession  
274 numbers JF771616.1 to JF772053.1 and JQ439009.1 to JQ439486.1, and Bilodeau and  
275 Robideau<sup>35</sup>; n.b. a total of 123 species are currently described; <http://www.phytophthoradb.org>).

276 When sequence and taxonomic data had been obtained for each of these genetic markers, we ran  
277 the metaxa2\_dbb software on each data set using the conserved, divergent and hybrid modes. We  
278 also enabled the self-evaluation option, which performs a cross-validation of the database  
279 performance similar to that of Richardson et al.<sup>16</sup>. For the self-evaluation we used the default  
280 settings, which correspond to rebuilding the database ten times, each time using 90% of the input  
281 sequences to build the database (the training set) and then subsequently classifying the remaining  
282 10% of input sequences (the testing set) using Metaxa2. The predicted taxonomic classifications  
283 were then compared against the taxonomic identity of each test sequence derived from the  
284 source databases at every taxonomic level, generating measures for sensitivity (proportion of test  
285 sequences identified as matching the barcoding region), specificity (proportion of correctly  
286 classified sequences at the taxonomic level in question), and the error per classification ratio  
287 (proportion of incorrectly classified sequences per total classifications made).

288 In addition to the software self-evaluation, we also tested the classification performance of the  
289 different databases on sequence fragments derived from the sequences used to build the  
290 respective database. This evaluation followed the method used for the original Metaxa2 paper<sup>17</sup>,  
291 although we only generated fragments of a single length, viz. 150 nucleotides. The test sets were  
292 generated by randomly selecting a stretch of 150 nucleotides from every sequence in the input  
293 data for each barcoding region. We then used Metaxa2 version 2.2 to classify these simulated  
294 read data sets and calculated the performance for each barcoding region in terms of accuracy  
295 (proportion of correctly classified sequence fragments), misclassifications (incorrect assignments),  
296 sensitivity (proportion of non-detected sequence fragments), and over-prediction (incorrect  
297 assignment to a rank for which there is no reference belonging to the query taxa present in the  
298 database). Sequence fragments were regarded as correctly classified if their reported taxonomy  
299 corresponded to the known taxonomy of the input sequence that the fragment was derived from,  
300 at every taxonomic level as reported by Metaxa2. If any incorrect taxonomic affiliations were  
301 reported at any taxonomic level, the fragment was regarded as misclassified.

302 We finally compared the performance of the hand-curated Metaxa2 SSU rRNA database that is  
303 bundled with the software to SSU rRNA databases built by metaxa2\_dbb from the sequences in  
304 SILVA release 111 and 128<sup>28</sup>. The native Metaxa2 database is based on SILVA release 111, which  
305 means that the comparison between the native database and release 111 is relevant to understand  
306 the differences between the manual and automatic database constructions. The difference to  
307 release 128, on the other hand, is rather a test of whether the accuracy changes with the addition  
308 of more reference sequences. The SILVA databases were created by downloading the FASTA file  
309 representing the reference SSU sequences with 99% non-redundancy (SSURef\_Nr99) with

310 taxonomy from SILVA. We then added the SSU sequences for the 12S rRNA used in the native  
311 Metaxa2 database from MitoZoa<sup>17,36</sup>. From these, we used Metaxa2 version 2.1.2 (default settings)  
312 to divide the SSU sequences by taxonomic domain. The resulting files were used as input for  
313 metaxa2\_dbb, which was run by retaining the HMM profiles from the native database, i.e. only  
314 rebuilding the classification database. In all cases, taxonomy correction was used, and cutoffs  
315 were manually set to "0,60,70,75,85,90,97"<sup>17</sup>. The full options were: "metaxa2\_dbb -o  
316 SSU\_SILVAXXX -g SSU -p metaxa2\_db/SSU/HMMs/ -t  
317 SILVA\_XXX\_SSURef\_Nr99\_tax\_silva.fasta -a archaea.fasta -b bacteria.fasta -c chloroplast.fasta  
318 -e eukaryota.fasta -m mitochondria.fasta -n mitozoa\_SSU.fasta --correct\_taxonomy T --cutoffs  
319 '0,60,70,75,85,90,97' --cpu 16". For each SILVA release, two databases were built, one with the  
320 command above, and one in which filtering of taxonomic information was applied, adding the "--  
321 filter\_uncultured T --filter\_level 6" options.

322 After these new SILVA-based classification databases had been constructed, we classified the  
323 simulated SSU read fragments with high-quality taxonomic information used in the original  
324 Metaxa2 evaluation, and ran this in the same way as in the original paper<sup>17</sup>. The results of the  
325 classifications were investigated manually to make sure that errors made by Metaxa2 were due to  
326 actual classification errors and not renaming of taxa, inconsistencies in taxonomy between  
327 database versions, synonymous names used for one taxon, or misspellings. As in the original  
328 Metaxa2 paper, a sequence fragment was regarded correctly classified if the reported taxonomy  
329 corresponded to the known taxonomy of the input sequence at every taxonomic level, as  
330 reported by Metaxa2. If the Metaxa2 classification was found to completely correspond to the  
331 known taxonomic affiliation at all investigated taxonomic levels, the sequence fragment was



332 regarded as perfectly classified. If Metaxa2 reported any incorrect taxonomic affiliation at any  
333 taxonomic level the fragment was regarded as misclassified.

334

### 335 **Acknowledgements**

336 The authors would like to thank Prof. Christer Erséus for input on the International Code of  
337 Zoological Nomenclature. JBP acknowledges financial support from the Swedish Research  
338 Council for Environment, Agricultural Sciences and Spatial Planning (FORMAS; grant 2016-  
339 768). RTR was supported by a Project Apis m. - Costco Honey Bee Biology Fellowship. KME  
340 acknowledges financial support from FORMAS (grant 2012-86). RHN acknowledges funding  
341 from FORMAS (grant 215-2011-498).

### 342 **Author contributions**

343 JBP and RTR conceived and designed the study. JBP designed the software, with input from  
344 RTR, RMJ, MH and RHN. JBP implemented the software. JBP, KME and RHN updated the  
345 software manual. RTR, CW, EDT, MM, KT, GJB and RMJ provided and curated data for  
346 software evaluation. JBP, RTR, CW, MM, KT and KK evaluated software performance. JBP,  
347 KME, MH and RHN updated the classification databases. JBP drafted the manuscript, with help  
348 from RTR and RHN. All authors contributed to and approved the final manuscript.

### 349 **Competing financial interests**

350 The authors declare no competing financial interests.



352 **Figure legends**

353 **Fig. 1.** Self-evaluated performance of the Metaxa2 Database Builder in different operating modes  
354 (conserved, divergent and hybrid) on ten different DNA barcoding regions. A) Proportion of  
355 assigned sequences classified to the correct order (circles), family (diamonds) and genera  
356 (triangles). B) Proportion of correctly assigned sequences multiplied with the proportion of  
357 sequences included in the final classification databases (see Supplementary Fig. 2). The ATP9-  
358 NAD9 genetic marker is not shown, because it only had relevant taxonomic differences at the  
359 species level.

360

361 **Fig. 2.** Family level Metaxa2 performance on randomly generated 150 bp fragments originating  
362 from the sequence datasets used to build the respective databases in the three different modes  
363 (Conserved, Divergent and Hybrid). A) Proportions of fragments assigned to the correct  
364 taxonomic family. B) Proportions of fragments assigned to an incorrect family. C) Proportions of  
365 fragments not assigned, or not recognized as belonging to the investigated barcoding region, at  
366 the family level. D) Family-level overpredictions, i.e. the proportions of sequence fragments  
367 belonging to a family not present in the final database, which were still assigned to a (different)  
368 family by Metaxa2. Note that the ATP9-NAD9 dataset is only used for species identification and  
369 thus this marker would be expected to show perfect performance on the family level. Note also  
370 that the Y-axis scales are different for B and for D compared to A and C.

371 **References**

- 372 1. Woese, C. R., Kandler, O. & Wheelis, M. L. Towards a natural system of organisms:  
 373 proposal for the domains Archaea, Bacteria, and Eucarya. *Proc Natl Acad Sci USA* **87**,  
 374 4576–4579 (1990).
- 375 2. Hibbett, D. *et al.* Sequence-based classification and identification of Fungi. *Mycologia*  
 376 (2016). doi:10.3852/16-130
- 377 3. Yoccoz, N. G. The future of environmental DNA in ecology. *Mol Ecol* **21**, 2031–2038  
 378 (2012).
- 379 4. Taberlet, P., Coissac, E., Pompanon, F., Brochmann, C. & Willerslev, E. Towards next-  
 380 generation biodiversity assessment using DNA metabarcoding. *Mol Ecol* **21**, 2045–2050  
 381 (2012).
- 382 5. Bengtsson-Palme, J. *et al.* Strategies to improve usability and preserve accuracy in  
 383 biological sequence databases. *Proteomics* **16**, 2454–2460 (2016).
- 384 6. Nilsson, R. H. *et al.* Taxonomic reliability of DNA sequences in public sequence databases:  
 385 a fungal perspective. *PLoS ONE* **1**, e59 (2006).
- 386 7. Wang, X.-C. *et al.* ITS1: a DNA barcode better than ITS2 in eukaryotes? *Mol Ecol Resour*  
 387 **15**, 573–586 (2015).
- 388 8. Lindahl, B. D. *et al.* Fungal community analysis by high-throughput sequencing of  
 389 amplified markers - a user's guide. *New Phytol* (2013). doi:10.1111/nph.12243
- 390 9. Bruns, T. D. & Taylor, J. W. Comment on "Global assessment of arbuscular mycorrhizal  
 391 fungus diversity reveals very low endemism". *Science* **351**, 826 (2016).
- 392 10. Richardson, R. T. *et al.* Rank-based characterization of pollen assemblages collected by  
 393 honey bees using a multi-locus metabarcoding approach. *Appl Plant Sci* **3**, (2015).
- 394 11. Schoch, C. L. *et al.* Nuclear ribosomal internal transcribed spacer (ITS) region as a  
 395 universal DNA barcode marker for Fungi. *Proc Natl Acad Sci USA* **109**, 6241–6246 (2012).
- 396 12. Hebert, P. D. N., Ratnasingham, S. & deWaard, J. R. Barcoding animal life: cytochrome c  
 397 oxidase subunit 1 divergences among closely related species. *Proc Biol Sci* **270 Suppl 1**,  
 398 S96–9 (2003).
- 399 13. Wang, Q., Garrity, G. M., Tiedje, J. M. & Cole, J. R. Naive Bayesian classifier for rapid  
 400 assignment of rRNA sequences into the new bacterial taxonomy. *Appl Environ Microbiol* **73**,  
 401 5261–5267 (2007).
- 402 14. Soergel, D. A. W., Dey, N., Knight, R. & Brenner, S. E. Selection of primers for optimal  
 403 taxonomic classification of environmental 16S rRNA gene sequences. *ISME J* **6**, 1440–  
 404 1444 (2012).
- 405 15. Edgar, R. SINTAX: a simple non-Bayesian taxonomy classifier for 16S and ITS sequences.  
 406 *bioRxiv* 074161 (2016). doi:10.1101/074161
- 407 16. Richardson, R. T., Bengtsson-Palme, J. & Johnson, R. M. Evaluating and optimizing the  
 408 performance of software commonly used for the taxonomic classification of DNA  
 409 metabarcoding sequence data. *Mol Ecol Resour* **17**, 760–769 (2017).
- 410 17. Bengtsson-Palme, J. *et al.* Metaxa2: Improved identification and taxonomic classification  
 411 of small and large subunit rRNA in metagenomic data. *Mol Ecol Resour* **15**, 1403–1414  
 412 (2015).
- 413 18. Nilsson, R. H. *et al.* Five simple guidelines for establishing basic authenticity and reliability  
 414 of newly generated fungal ITS sequences. *MycKeys* **4**, 37–63 (2012).

- 415 19. Hartmann, M., Howes, C. G., Abarenkov, K., Mohn, W. W. & Nilsson, R. H. V-Xtractor:  
416 an open-source, high-throughput software tool to identify and extract hypervariable  
417 regions of small subunit (16S/18S) ribosomal RNA gene sequences. *J Microbiol Methods* **83**,  
418 250–253 (2010).
- 419 20. Dahllöf, I., Baillie, H. & Kjelleberg, S. rpoB-based microbial community analysis avoids  
420 limitations inherent in 16S rRNA gene intraspecies heterogeneity. *Appl Environ Microbiol*  
421 **66**, 3376–3380 (2000).
- 422 21. Bengtsson-Palme, J. **Strategies for Taxonomic and Functional Annotation of**  
423 **Metagenomes** in *Metagenomics: Perspectives, Methods, and Applications* (ed. Nagarajan, M.) 55–  
424 79 (Academic Press, Elsevier, Oxford, 2018).
- 425 22. Eddy, S. HMMER. <http://hmmer.janelia.org> (2010).
- 426 23. Altschul, S. F. *et al.* Gapped BLAST and PSI-BLAST: a new generation of protein  
427 database search programs. *Nucleic Acids Res* **25**, 3389–3402 (1997).
- 428 24. Katoh, K. & Standley, D. M. MAFFT multiple sequence alignment software version 7:  
429 improvements in performance and usability. *Mol Biol Evol* **30**, 772–780 (2013).
- 430 25. Edgar, R. C. Search and clustering orders of magnitude faster than BLAST. *Bioinformatics*  
431 **26**, 2460–2461 (2010).
- 432 26. Rognes, T., Flouri, T., Nichols, B., Quince, C. & Mahé, F. VSEARCH: a versatile open  
433 source tool for metagenomics. *PeerJ* **4**, e2584 (2016).
- 434 27. Clark, K., Karsch-Mizrachi, I., Lipman, D. J., Ostell, J. & Sayers, E. W. GenBank. *Nucleic*  
435 *Acids Res* **44**, D67–72 (2016).
- 436 28. Quast, C. *et al.* The SILVA ribosomal RNA gene database project: improved data  
437 processing and web-based tools. *Nucleic Acids Res* **41**, D590–6 (2013).
- 438 29. McDonald, D. *et al.* An improved Greengenes taxonomy with explicit ranks for ecological  
439 and evolutionary analyses of bacteria and archaea. *ISME J* **6**, 610–618 (2012).
- 440 30. Federhen, S. The NCBI Taxonomy database. *Nucleic Acids Res* **40**, D136–43 (2012).
- 441 31. James, T. Y. *et al.* Reconstructing the early evolution of Fungi using a six-gene phylogeny.  
442 *Nature* **443**, 818–822 (2006).
- 443 32. Yilmaz, P. *et al.* The SILVA and ‘All-species Living Tree Project (LTP)’ taxonomic  
444 frameworks. *Nucleic Acids Res* **42**, D643–8 (2014).
- 445 33. Kozlov, A. M., Zhang, J., Yilmaz, P., Glöckner, F. O. & Stamatakis, A. Phylogeny-aware  
446 identification and correction of taxonomically mislabeled sequences. *Nucleic Acids Res* **44**,  
447 5022–5033 (2016).
- 448 34. Hill, J. E., Penny, S. L., Crowell, K. G., Goh, S. H. & Hemmingsen, S. M. cpnDB: a  
449 chaperonin sequence database. *Genome Res* **14**, 1669–1675 (2004).
- 450 35. Bilodeau, G. J. & Robideau, G. P. Optimization of nucleic acid extraction from field and  
451 bulk samples for sensitive direct detection of plant pests. *Phytopathology* **104**, S3.14 (2014).
- 452 36. D’Onorio de Meo, P. *et al.* MitoZoa 2.0: a database resource and search tools for  
453 comparative and evolutionary analyses of mitochondrial genomes in Metazoa. *Nucleic Acids*  
454 *Res* **40**, D1168–72 (2012).
- 455
